# Supplementary material for: 179 『黄帝内経』における虚実の概念の研究その2『素問』における「虚」の概念
Source: Hindawi journal article supplement (doi:10.1155/2015/453423), 2000-05-23
Supplement: f1 [file 453423.f1.pdf]

Suppl. Table 1. Identification of plasma metabolites in stroke patients (Non-BS and BS) analyzed using ultra-performance liquid chromatography-quadrupole time-of-flight mass spectrometry

| Identity          | Exact mass (M+H) | Actual mass (M+H) | Mass error (mDa) | MS fragments (ESI) | Fold change (BS vs. Non-BS ) | P-value <sup>a</sup> | VIP  |
|-------------------|------------------|-------------------|------------------|--------------------|------------------------------|----------------------|------|
| Proline           | 116.0712         | 116.0703          | 0.9              | 70                 | 1.19                         | 0.128                | 2.09 |
| Valine            | 118.0868         | 118.0858          | 1.0              | 72                 | 1.10                         | 0.544                | 0.96 |
| Betaine           | 118.0868         | 118.0873          | -0.5             | 58                 | 1.12                         | 0.187                | 0.88 |
| Nicotinamide      | 123.0558         | 123.0568          | -1.0             | 123,80             | 1.29                         | 0.833                | 0.33 |
| Pyroglutamic acid | 130.0504         | 130.0527          | -2.3             | 84                 | 1.11                         | 0.228                | 0.54 |
| Pipecolic acid    | 130.0868         | 130.0878          | -1.0             | 91,84,72           | 2.02                         | 0.186                | 1.36 |
| Isoleucine        | 132.1025         | 132.1017          | 0.8              | 119,86,72          | 1.05                         | 0.909                | 0.4  |
| Aspartic acid     | 134.0453         | 134.0034          | 41.9             | 113,72             | -1.18                        | 0.646                | 0.49 |
| Pheylacetamide    | 136.0762         | 136.0779          | -1.7             | 119.107,91         | 1.13                         | 0.384                | 0.63 |
| Hypoxanthine      | 137.0463         | 137.0456          | 0.7              | 119.110.94.82      | 1.53                         | 0.737                | 1.81 |
| Glutamine         | 147.077          | 147.0807          | -3.7             | 130,84             | -1.04                        | 0.863                | 0.15 |
| Methionine        | 150.0589         | 150.0605          | -1.6             | 130,116,70         | 1.35                         | 0.077                | 1.5  |
| Phenylglycine     | 152.0712         | 152.0724          | -1.2             | 105,78             | 1.15                         | 0.804                | 0.08 |
| Carnitine         | 162.113          | 162.1146          | -1.6             | 85,60              | 1.26                         | 0.071                | 2.49 |
| Hydrolysine       | 163.1083         | 163.1197          | -11.4            | 128,82             | 1.08                         | 0.586                | 0.15 |
| Phenylalanine     | 166.0868         | 166.0832          | 3.6              | 120,103,93         | 1.11                         | 0.149                | 2.93 |
| Uric acid         | 169.0362         | 169.0367          | -0.5             | 152,141,126,70     | 1.14                         | 0.132                | 1.66 |

|                     |          |          |       |                |       |       |       |
|---------------------|----------|----------|-------|----------------|-------|-------|-------|
| Arginine            | 175.1195 | 175.1241 | -4.6  | 130,116,70     | 1.09  | 0.548 | 0.18  |
| Tyrosine            | 182.0817 | 182.0831 | -1.4  | 165,136,123    | 1.24  | 0.207 | 1.76  |
| Gly-Leu             | 189.1239 | 189.1801 | -56.2 | 171,143,86     | -1.26 | 0.188 | 0.23  |
| Tryptophane         | 205.0799 | 205.0951 | -15.2 | 188,146,118    | 1.08  | 0.577 | 1.58  |
| Isobutyrylcarnitine | 232.1549 | 232.1576 | -2.7  | 217,144,85     | 1.31  | 0.364 | 0.50  |
| Dodecanoylcarnitine | 344.2801 | 344.2851 | -5    | 285,144,85     | -1.03 | 0.814 | 0.02  |
| Linoleylcarnitine   | 424.3427 | 424.347  | -4.3  | 352,144,85     | -1.58 | 0.378 | 0.45  |
| Vaccenylcarnitine   | 426.3583 | 426.3599 | -1.6  | 367,144,85     | 1.00  | 0.696 | 0.00  |
| LPC(C14:0)          | 468.309  | 468.3104 | -1.4  | 450,184,104,86 | -1.02 | 0.646 | 0.07  |
| LPE(C18:2)          | 478.2934 | 478.295  | -1.6  | 337,104        | 1.05  | 0.883 | 0.16  |
| LPC(C15:0)          | 482.3168 | 482.327  | -10.2 | 464,184,104,86 | -1.08 | 0.784 | 0.13  |
| LPC(C16:1)          | 494.3247 | 494.3245 | 0.2   | 476,184,104,86 | -1.21 | 0.799 | 0.78  |
| LPC(C16:0)          | 496.3403 | 496.337  | 3.3   | 478,184,104,86 | -1.03 | 0.844 | 0.26  |
| LPE(C20:4)          | 502.2934 | 502.2966 | -3.2  | 361,104        | 1.22  | 0.383 | 0.52  |
| LPC(C17:1)          | 508.3767 | 508.3784 | -1.7  | 490,184,104,86 | 1.58  | 0.106 | 0.57  |
| LPC(C17:0)          | 510.3556 | 510.3587 | -3.1  | 492,184,104,86 | -1.01 | 0.742 | 0.02  |
| LPC(C18:3)          | 518.3247 | 518.3268 | -2.1  | 500,184,104,86 | -1.24 | 0.510 | 0.300 |
| LPC(C18:2)          | 520.3403 | 520.3338 | 6.5   | 502,184,104,86 | 1.14  | 0.486 | 2.19  |
| LPC(C18:1)          | 522.356  | 522.3499 | 6.1   | 504,184,104,86 | -1.00 | 1.000 | 0.06  |
| LPC(C18:0)          | 524.3716 | 524.3656 | 6     | 506,184,104,86 | -1.08 | 0.838 | 1.53  |

|            |          |          |     |                |      |       |      |
|------------|----------|----------|-----|----------------|------|-------|------|
| LPC(C20:4) | 544.3403 | 544.3396 | 0.7 | 526,184,104,86 | 1.07 | 0.664 | 0.48 |
|------------|----------|----------|-----|----------------|------|-------|------|

---

<sup>a</sup>, p value was calculated using Mann-Whitney U-test
